# Supplementary material for: Novelties of triphasic phase transfer catalysed Zinin reduction of nitrochlorobenzene by H2S-laden monoethanolamine
Source: Royal Society of Chemistry journal article supplement (doi:10.1039/c5ra26856g), 2016-01-01
Supplement: c5ra26856g1.pdf [file c5ra26856g1.pdf]

Supplementary Information for

**Novelties of triphasic phase transfer catalysed Zinin reduction of  
nitrochlorobenzene by  $H_2S$ -laden monoethanolamine**

*Ujjal Mondal, Aslam Puthankot, Sujit Sen\*, Gaurav Singh*

Catalysis Research Laboratory, Department of Chemical Engineering, National Institute of  
Technology, Rourkela – 769008, India

\*Corresponding author: Tel: +91-9938246590; Fax: +91-661-2462999; Email: sensujit@nitrkl.ac.in

**Table of Contents:**

|                                                                                                                   |    |
|-------------------------------------------------------------------------------------------------------------------|----|
| General Information                                                                                               | S2 |
| Figure S1: $^1H$ -NMR spectrum of m-chloroaniline in $CDCl_3$                                                     | S3 |
| Figure S2: $^{13}C$ -NMR spectrum of m-chloroaniline in $CDCl_3$                                                  | S3 |
| Spectroscopic data of m-Chloroaniline                                                                             | S4 |
| Figure S3: GC spectra showing formation of m-chloroaniline from reactant m-chloronitrobenzene in solvent toluene. | S4 |
| Figure S4: Mass spectra for all the peaks shown in Figure S3                                                      | S5 |
| Figure S5: Mass spectra of product m-Chloroaniline                                                                | S5 |

## General Information:

Method of GC-FID and GC-MS:

In present work, GC-MS of model with FID detector has been used for analysis. The column used was DB-5MS capillary column with dimension  $30\text{ m} \times 320\text{ }\mu\text{m} \times 0.25\text{ }\mu\text{m}$ . The optimum programming conditions of GC is as follows:

- Oven Conditions: Initial Temperature:  $60^{\circ}\text{ C}$ , Maximum Oven temperature:  $324^{\circ}\text{ C}$ , Ramp 1 -  $50^{\circ}\text{ C/min}$ , from  $60^{\circ}\text{ C}$  to  $190^{\circ}\text{ C}$ ; Ramp 2 -  $15^{\circ}\text{ C/min}$ , form  $190^{\circ}\text{ C}$  to  $230^{\circ}\text{ C}$ .
- Column Flow rate ( $\text{N}_2$ )–  $1.6\text{ mL/min}$ , Pressure –  $16.724\text{ psi}$ ,
- FID detector conditions: Heater temperature-  $300^{\circ}\text{ C}$ , Air flow rate-  $400\text{ml/min}$ ,  $\text{H}_2$  fuel flow  $30\text{ml/min}$ , makeup flow  $\text{N}_2$ –  $25\text{ mL/min}$

The optimum programming conditions of MS is as follows:

- Column flow rate-  $1\text{mL/min}$ , pressure-  $7.6522\text{ psi}$ .
- Oven conditions: Initial Temperature:  $60^{\circ}\text{ C}$ , Maximum Temperature-  $324^{\circ}\text{ C}$ , Initial Temperature:  $60^{\circ}\text{ C}$ , Maximum Oven temperature:  $324^{\circ}\text{ C}$ , Ramp 1 -  $50^{\circ}\text{ C/min}$ , from  $60^{\circ}\text{ C}$  to  $190^{\circ}\text{ C}$ ; Ramp 2 -  $15^{\circ}\text{ C/min}$ , form  $190^{\circ}\text{ C}$  to  $230^{\circ}\text{ C}$ .

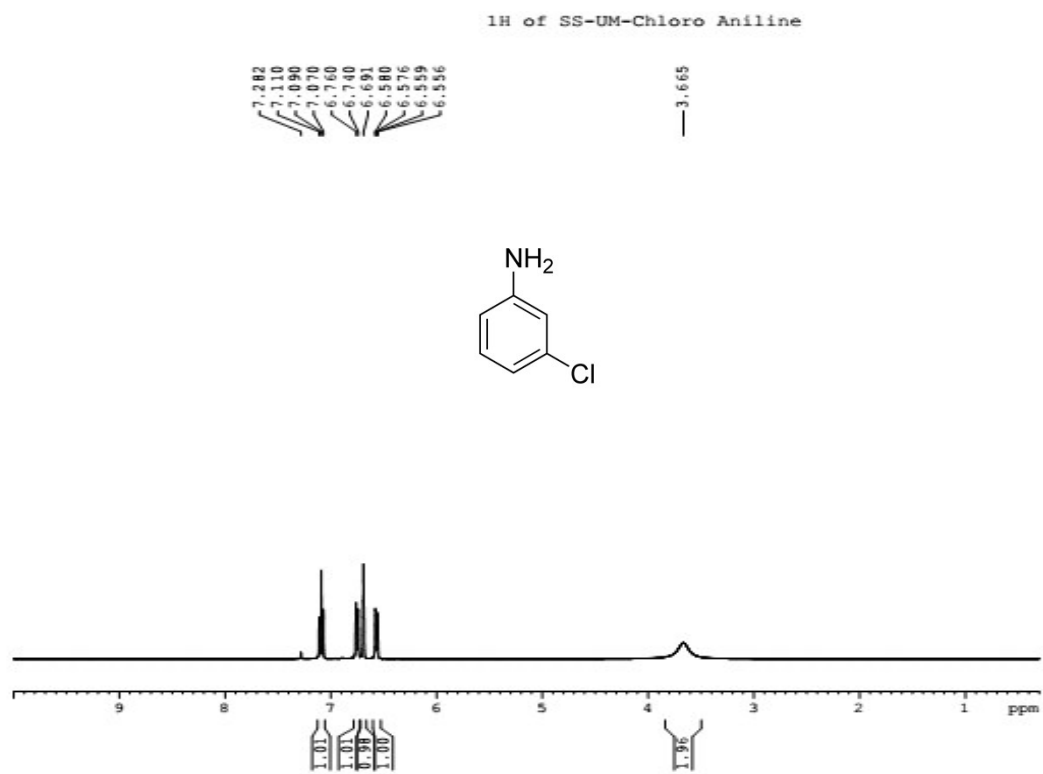

Figure S1:  $^1\text{H}$ -NMR spectrum of m-chloroaniline in  $\text{CDCl}_3$

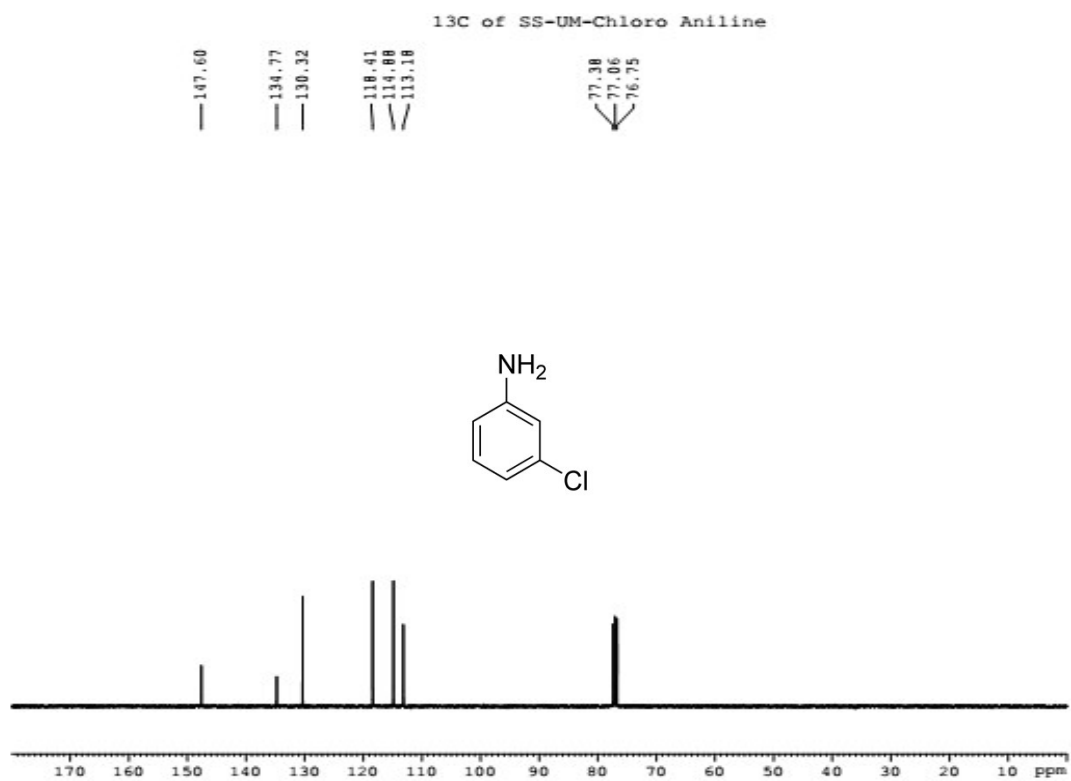

Figure S2:  $^{13}\text{C}$ -NMR spectrum of m-chloroaniline in  $\text{CDCl}_3$

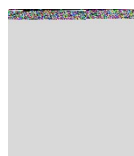

**m-Chloroaniline** colourless liquid,  $^1\text{H-NMR}$  (400 MHz,  $\text{CDCl}_3$ , 293K, TMS)  $\delta$ = 3.665 (2H, s), 6.556 (1H, dd,  $J$ = 6.8 & 1.2 Hz), 6.6691(1H, S), 6.780(1H, d,  $J$ = 8Hz), 7.670 (1H, t,  $J$ =8Hz);  $^{13}\text{C-NMR}$  (400 MHz,  $\text{CDCl}_3$ , 293K, TMS) 113.18, 114.88, 118.91, 130.32, 134.77, 147.60.

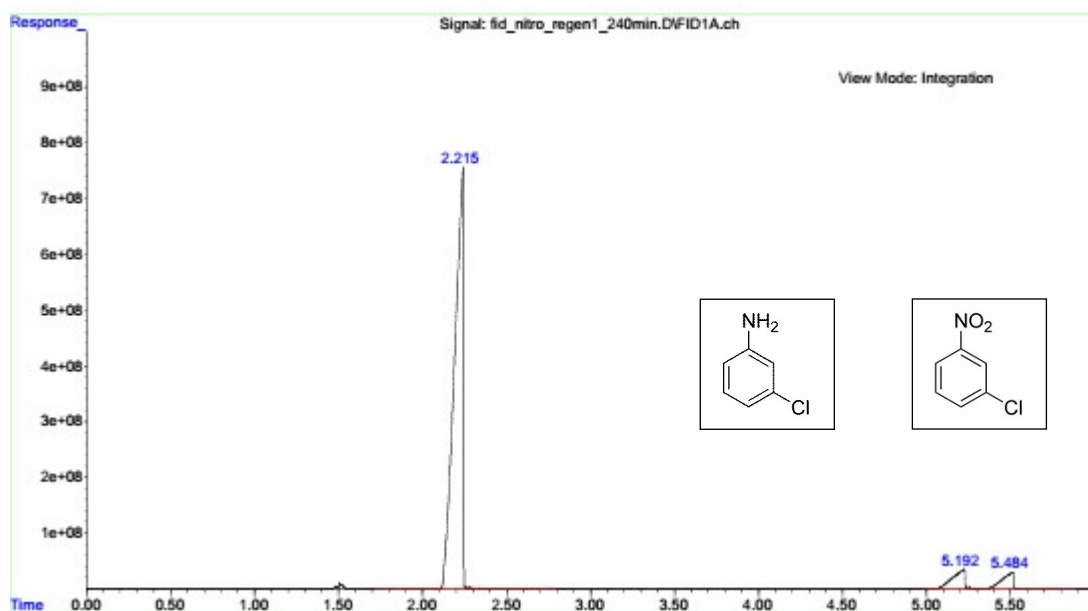

Figure S3: GC Spectra showing formation of m-chloroaniline from reactant m-chloronitrobenzene in solvent toluene.

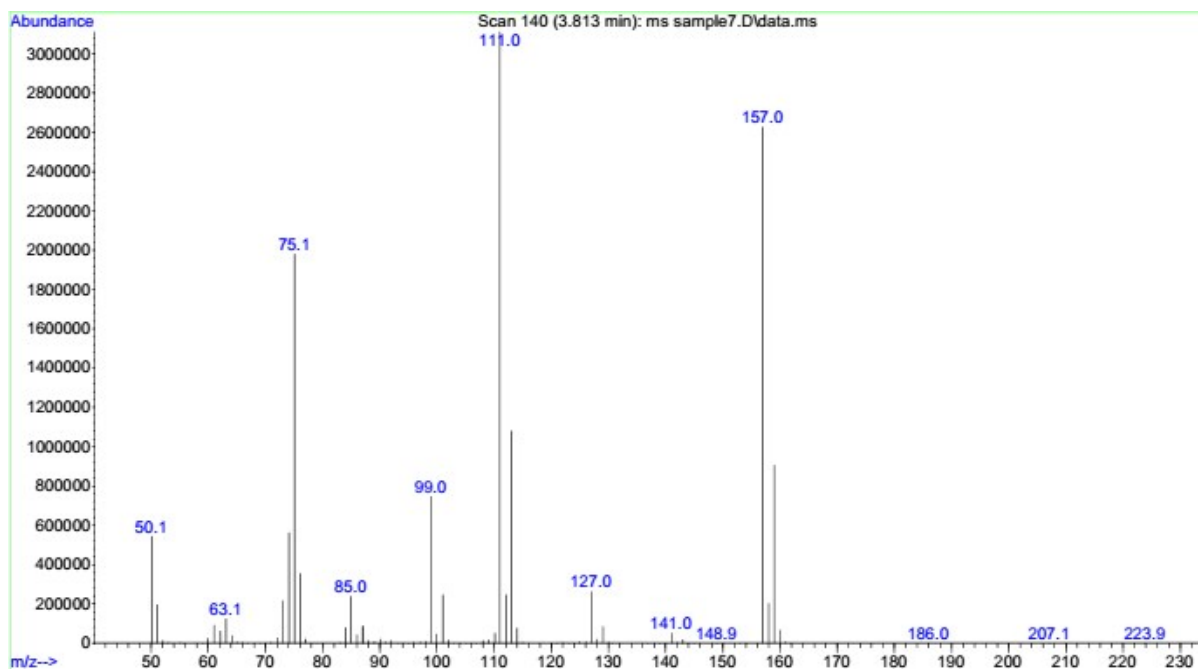

Figure S4: Mass spectra for all the peaks shown in Figure S3

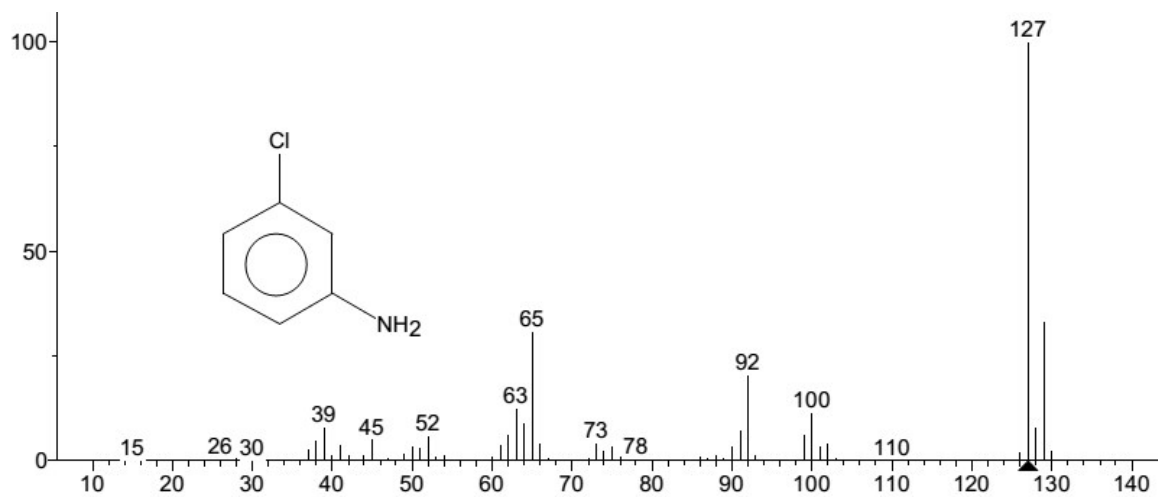

Figure S5: Mass spectra of product m-Chloroaniline
